# Supplementary material for: From rain to radiance - Drivers of tropical carbon flux interannual variability shift with local climate
Source: Research Square preprint supplement (doi:10.21203/rs.3.rs-5040347/v1), 2024-09-30

Supplementary Materials for

**From rain to radiance - Drivers of tropical carbon flux interannual variability shift with local climate**

Shuang Ma*, Junjie Liu* *et al.*

*Corresponding author. Email: ecoshuang@gmail.com; [junjie.liu@jpl.nasa.gov](mailto:junjie.liu@jpl.nasa.gov)

**This file includes:**

Figs. S1 to S14

Tables S1

Fig. S1.

Figure S1 Modeled tropical GPP, NBE, EWT, ABGB compared to observations, at pixel levels.

Fig. S2.

Figure S2 Modeled tropical GPP, NBE, EWT, and ABGB compared to observations, aggregated at the continental scale. Red lines are observations, black lines are mediums from data-model fusion posterior distribution, grey lines are the 5-95 percentiles from the posterior distribution. SSAM: tropical South Hemisphere South America; NSAM: tropical North Hemisphere South America; NAF: tropical North Africa; SAF: tropical South Africa; AS: tropical Asia; AU: tropical Australia.

Fig. S3.

Figure S3 Vegetation map according to MODIS MCD12C v6.1. AF is tropical Africa. AM-American, AF-Africa, ASAU-Asia and Australia. EF-evergreen forest, SA-semi-arid (shrubland and savanna), GR-grassland and cropland. Rainforest is divided into two categories using MAP=2800mm as threshold (MAP>2800mm for Moist rainforest and MAP<2800mm for Seasonally Moist rainforest).

Fig. S4.

Figure S4. Map showing the dominant climate factors for heterotrophic respiration (Rh) and Autotrophic respiration (Ra) during 2010-2021. The three largest climate factors for carbon fluxes IAV, precipitation, VPD, and radiation, are chosen to calculate their relative importance in this tricolored map.

Fig. S5.

Figure S5. Relative importance of climate drivers on GPPIAV per category of pixels grouped by environmental and biological mean states. Grey numbers on the bottoms are the count of pixels that falls in each category shown in the x axis.

Fig. S6.

Figure S6. Ternary map showing the dominant climate factors for net carbon exchange (NEE) and its componential fluxes (GPP and ER) during 2015-2016 El nino and 2010-2011 La nina. The three largest climate factor for carbon fluxes IAV, precipitation, VPD, and radiation, are chosen to calculate their relative importance in this tricolored map.

Figure S7. Relative importance of climate drivers to the IAV of GPP, ER, and NEE during 2015-2016 El nino and 2010-2011 La nina. Grid-cell data is grouped according to the continent and the main plant functional types (PFTs, using land cover data from MODIS, threshold=60%). AM-American, AF-Africa, ASAU-Asia and Australia. EF-evergreen forest, SH-shrubland and savanna, GR-grassland and cropland. Rainforest is divided into two categories using MAP=2800mm as threshold (MAP>2800mm for Moist rainforest and MAP<2800mm for Seasonally Moist rainforest). Boxes and whisks show median, 5%, 25%, 75%, and 95% percentiles. Grey numbers on the bottoms are the count of pixels that falls in each PFT category shown in the x-label. Grey numbers on the tops are the mean annual precipitation across all the pixels that falls in the same PFT category.

Fig. S8.

Figure S8. Sensitivity of GPP, ER, and NEE to climate drivers in the dry and wet seasons of 2015-2016. Grid-cell data is grouped according to the continent and the main plant functional types (PFTs, using land cover data from MODIS, threshold=60%). AM-American, AF-Africa, ASAU-Asia and Australia. EF-evergreen forest, SH-shrubland and savanna, GR-grassland and cropland. Rainforest is divided into two categories using MAP=2800mm as threshold (MAP>2800mm for Moist rainforest and MAP<2800mm for Seasonally Moist rainforest). Boxes and whisks show median, 5%, 25%, 75%, and 95% percentiles. Grey numbers on the bottoms are the count of pixels that falls in each PFT category shown in the x-label. Grey numbers on the tops are the mean annual precipitation across all the pixels that falls in the same PFT category.

Fig. S9.


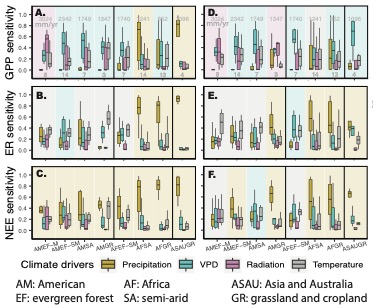


Figure S9. Sensitivity of GPP, ER, and NEE to climate drivers during 2015-2016 El nino and 2010-2011 La nina. Grid-cell data is grouped according to the continent and the main plant functional types (PFTs, using land cover data from MODIS, threshold=60%). AM-American, AF-Africa, ASAU-Asia and Australia. EF-evergreen forest, SH-shrubland and savanna, GR-grassland and cropland. Rainforest is divided into two categories using MAP=2800mm as threshold (MAP>2800mm for Moist rainforest and MAP<2800mm for Seasonally Moist rainforest). Boxes and whisks show median, 5%, 25%, 75%, and 95% percentiles. Grey numbers on the bottoms are the count of pixels that falls in each PFT category shown in the x-label. Grey numbers on the tops are the mean annual precipitation across all the pixels that falls in the same PFT category.

Fig. S10.

Figure S10 Maps of standardized climate anomaly and GPP sensitivity to climate drivers for 2010-2021.

Fig. S11.

Figure S11 Monthly observations of GPP and ER in the evergreen forest and semi-arid region, based on satellite and in situ data. green lines are modeled GPP, red lines are modeled ER. Bars are monthly precipitation in mm/m2/day..

Fig. S12.

Figure S12 Normalized anomaly of monthly VPD and temperature derived from ERA5 in all of the seven American Semi-arid pixels. Blue lines are VPD, orange lines are temperature.

Fig. S13.

Figure S13. The relative importance of fire and interactions among fire, radiation, temperature, VPD is small to GPP, ER, and NEE IAV. Grey numbers on the bottom are counts of pixels that falls in each precipitation category.

Fig. S14.

Figure S14. Diagram of DALEC, adapted from Quetin et al., 2020; Bloom et al. 2016. P is precipitation, ET is evapotranspiration, R is runoff, GPP is gross primary production of CO2, Ra is autotrophic respiration, and Rh is heterotrophic respiration.

Table S1.


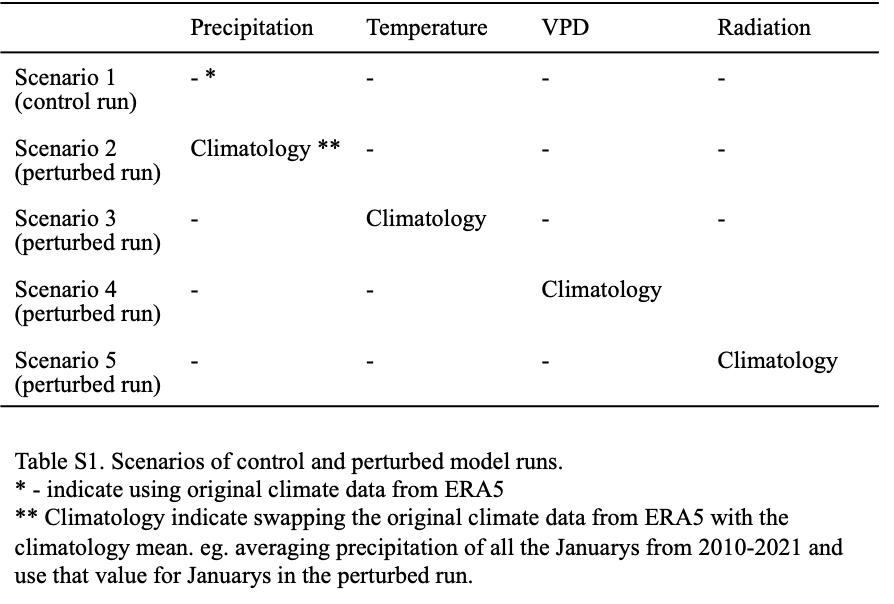

Supplement: Supplementary file 1 [file 90c98e9253d43c0deafdc8cd.docx]
